## EDITORIAL NOTE

# Editorial Note: Risk factors for vaginal mesh erosion after sacrocolpopexy in Korean women

The *PLOS One* Editors

The *PLOS One* Editors issue this Editorial Note because this article [1] was identified as one of a series of submissions for which we have concerns about aspects of the peer review process. Readers are advised to interpret the article [1] with caution.

The Editors have no evidence of any author involvement in the peer review process.

## Reference

1. Kim TY, Jeon MJ. Risk factors for vaginal mesh erosion after sacrocolpopexy in Korean women. *PLoS One*. 2020;15(2):e0228566. <https://doi.org/10.1371/journal.pone.0228566> PMID: [32040517](https://pubmed.ncbi.nlm.nih.gov/32040517/)

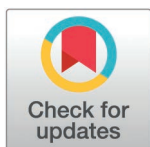

## OPEN ACCESS

**Citation:** The *PLOS One* Editors (2025) Editorial Note: Risk factors for vaginal mesh erosion after sacrocolpopexy in Korean women. *PLoS One* 20(12): e0339093. <https://doi.org/10.1371/journal.pone.0339093>

**Published:** December 18, 2025

**Copyright:** © 2025 The *PLOS One* Editors. This is an open access article distributed under the terms of the [Creative Commons Attribution License](https://creativecommons.org/licenses/by/4.0/), which permits unrestricted use, distribution, and reproduction in any medium, provided the original author and source are credited.
